# Supplementary material
Source: Springer Nature journal article supplement (https://www.springermedizin.de/resource/supplementary/12935_2009_234_MOESM4_ESM.pdf/9540172)

**Schematic Drawing of p27-5'UTR  
Reporter Plasmid**

**(a)**

pGL3 Control  
(without insert)

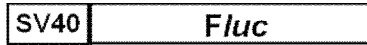

pGL3-p27-5'UTR

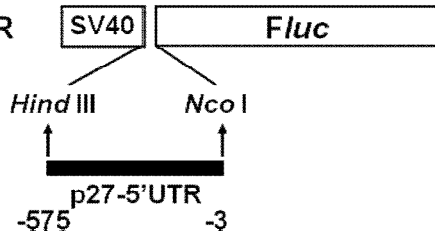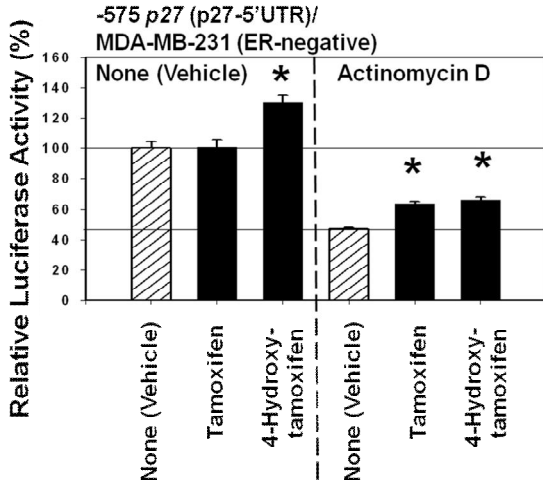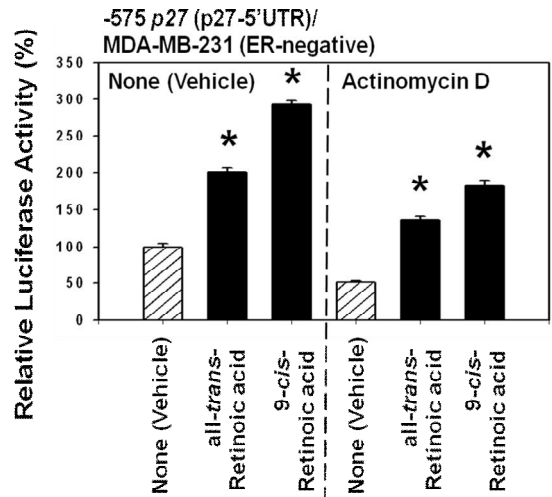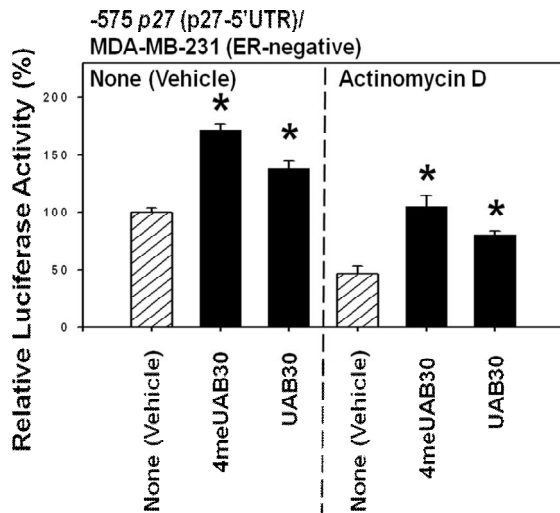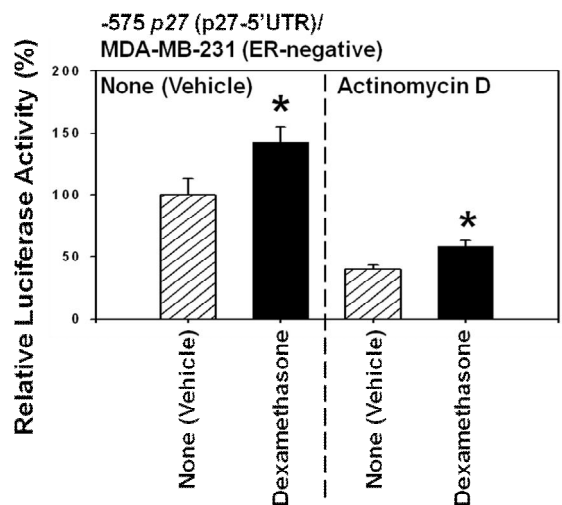

Supplement: MOESM4 [file 9540172]
